# Supplementary material
Source: publisher site journal article supplement (https://www.dovepress.com/article/376806)
Supplement: Supplementary file 1 [file get_supplementary_file.php]

**Supplementary materials**

**Table S1.** Medication use last 12 months at as assessed at follow-up among those with and without severe asthma according to GINA at follow-up.

|  | Other asthma n=875 | | Severe asthma n=131 | | p-value | | |
| --- | --- | --- | --- | --- | --- | --- | --- |
|  |  | |  | |  | | |
| Any SABA use | 41.8% | | 79.4% | | **<0.001** | | |
| SABA Daily | 6.6% | | 22.9% | | **<0.001** | | |
| SABA As needed | 35.2% | | 56.5% | | **<0.001** | | |
|  |  | |  | |  | | |
| Any ICS use* | 35.2% | | 100.0% | | **<0.001** | | |
| ICS Daily | 22.4% | | 100.0% | | **<0.001** | | |
| ICS As needed | 12.8% | | 0.0% | | **<0.001** | | |
|  |  | |  | |  | | |
| ICS dose (GINA) |  | |  | |  | | |
| Low dose ICS | 24.0% | | 0.0% | |  | | |
| Medium dose ICS | 10.8% | | 59.5% | |  | | |
| High dose ICS | 0.5% | | 40.5% | | **<0.001** | | |
|  |  | |  | |  | | |
| Any LABA use* | 16.6% | | 100.0% | | **<0.001** | | |
| LABA Daily | 11.0% | | 100.0% | | **<0.001** | | |
| LABA As needed | 5.6% | | 0.0% | | **0.005** | | |
|  |  | |  | |  | | |
| Any OCS use | 0.5% | | 10.7% | | **<0.001** | | |
| OCS Daily | 0.0% | | 3.1% | | **<0.001** | | |
| OCS Periodically (during exacerbations) | | 0.5% | | 7.6% | | **<0.001** |
|  |  | |  | |  | | |  |
| Other |  | |  | |  | | |  |
| LTRA | 0.8% | | 13.0% | | **<0.001** | | |  |
| Anticholinergic | 1.6% | | 7.6% | | **<0.001** | | |  |
|  |  | |  | |  | | |  |

*Single or in combination, SABA=Short-acting B2-agonist, LABA=Long-acting B2-agonist, ICS=Inhaled corticosteroids, OCS=Oral corticosteroids, LTRA=Leukotriene receptor antagonist, Medium ICS dose according to GINA=Budesonide >400-800mcg or equivalent, High ICS dose according to GINA=Budesonide >800mcg or equivalent. For ERS/ATS severe asthma, medication data have previously been presented elsewhere[4]. Bold font indicates p<0.05.

**Table S2.** Sensitization patterns for airborne allergens, blood eosinophils and neutrophils, and prevalence (%) of NSAID-related respiratory symptoms and nasal polyps at follow-up in 2012-2014 among those with and without severe asthma according to GINA at follow-up.

|  | Other asthma |  | Severe asthma | |
| --- | --- | --- | --- | --- |
|  | n=875 |  | n=131 | p-value |
| *Sensitization to:* |  |  |  |  |
| Any airborne allergen | 33.4% |  | 31.3% | 0.634 |
| Any pollen | 23.9% |  | 21.1% | 0.490 |
| Any animal | 22.1 |  | 25.8% | 0.352 |
| Any mite | 4.4% |  | 10.2% | **0.006** |
| Any mould | 2.6% |  | 7.0% | **0.008** |
|  |  |  |  |  |
| *Sensitization to specific mites:* |  |  |  |  |
| D. Pteronyssinus | 4.3% |  | 9.4% | **0.013** |
| D. Farinae | 3.7% |  | 7.8% | **0.030** |
|  |  |  |  |  |
| *Sensitization to specific moulds:* |  |  |  |  |
| Aspergillus fumigatus | 1.8% |  | 6.3% | **0.001** |
| Alternaria alternata | 0.6% |  | 3.9% | **0.001** |
| Cladosporum herbarum | 1.3% |  | 3.1% | 0.120 |
|  |  |  |  |  |
| *Multi-sensitization:* |  |  |  |  |
| Sensitization to ≥4 allergens* | 9.4% |  | 16.4% | **0.015** |
| Sensitization to ≥4 allergens*  but not to mites or moulds | 6.2% |  | 6.4% | 0.974 |
|  |  |  |  |  |
| *Cell counts* |  |  |  |  |
| Blood eosinophils (109/L), mean (SD) | 0.21 (0.16) |  | 0.27 (0.22) | **<0.001** |
| Blood neutrophils (109/L), mean (SD) | 3.72 (1.31) |  | 4.15 (1.78) | **<0.001** |
| Blood eosinophils ≥ 0.3 x109/L | 25.6% |  | 37.3% | **<0.001** |
| Blood neutrophils ≥ 5.0 x109/L | 14.7% |  | 22.0% | **0.039** |
|  |  |  |  |  |
| NSAID-related respiratory symptoms | 3.6% |  | 9.2% | **0.003** |
| Nasal polyps in adulthood | 5.4% |  | 9.2% | 0.085 |

*Included allergens = Birch, timothy, mugwort, cat, dog, horse, D. pteronyssinus, D. Farinae, aspergillus fumigatus, alternaria alternata, cladosporium herbarum. Sensitization was assessed by ImmunoCap Phadiatop and specific IgE. NSAID = nonsteroidal anti-inflammatory drugs. Bold font indicates p<0.05.

**Table S3.** Prevalence of allergic sensitization (any positive IgE) and sensitization to Aspergillus fumigatus and D. Pterinyssinus at the 2012-14 in relation to age at asthma onset, in other asthma and severe asthma according to GINA at follow-up.

|  | Prevalence of sensitization to  Any allergen (%) | | | | |  | Prevalence of sensitization to  Aspergillus (%) | | | | |  | Prevalence of sensitization to  D. Pterinyssinus (%) | | | | |
| --- | --- | --- | --- | --- | --- | --- | --- | --- | --- | --- | --- | --- | --- | --- | --- | --- | --- |
|  | Other asthma  N=771 | |  | Severe asthma  N=126 | |  | Other asthma  N=771 | |  | Severe asthma N=118 | |  | Other asthma  N=771 | |  | Severe asthma N=126 | |
|  | % | p-value |  | % | p-value |  | % | p-value |  | % | p-value |  | % | p-value |  | % | p-value |
|  |  |  |  |  |  |  |  |  |  |  |  |  |  |  |  |  |  |
| *Among those with age at asthma onset:* | | |  |  |  |  |  |  |  |  |  |  |  |  |  |  |  |
| ≥30 years | 17.9% |  |  | 18.8% |  |  | 1.1% |  |  | 3.8% |  |  | 3.9% |  |  | 1.3% |  |
| <30 years | 49.5% | **<0.001** |  | 54.3% | **<0.001** |  | 2.7% | 0.116 |  | 10.9% | 0.115 |  | 5.1% | 0.415 |  | 23.9% | **<0.001** |
|  |  |  |  |  |  |  |  |  |  |  |  |  |  |  |  |  |  |

Sensitization was assessed by ImmunoCap Phadiatop and specific IgE. Bold font indicates p<0.05.

**Table S4. Prevalence of adult onset asthma, by BMI at study entry and sex, in other asthma and severe asthma according to GINA at follow-up.**

|  | | |  | Prevalence of asthma onset ≥30 years (%) | | | | | | | | | | |  |
| --- | --- | --- | --- | --- | --- | --- | --- | --- | --- | --- | --- | --- | --- | --- | --- |
|  | | |  | Other asthma  N=780 | | | | |  | Severe asthma N=123 | | | | |  |
|  | | |  | % | | | p-value | |  | % | | | p-value | |  |
|  | | |  |  | | |  | |  |  | | |  | |  |
|  |  |  | | |  |  | |  | | |  |  | |
| Normal weight | | |  | 48.0% | | |  | |  | 61.5% | | |  | |  |
| Overweight | | |  | 64.6% | | |  | |  | 66.7% | | |  | |  |
| Obesity | | |  | 52.7% | | | **0.015** | |  | 66.7% | | | 0.912 | |  |
|  | | |  |  | | |  | |  |  | | |  | |  |
| *Among men with:* | | |  |  | | |  | |  |  | | |  | |  |
| Normal weight | | |  | 28.3% | | |  | |  | 65.0% | | |  | |  |
| Overweight | | |  | 48.4% | | |  | |  | 42.9% | | |  | |  |
| Obesity | | |  | 55.3% | | | **<0.001** | |  | 87.5% | | | 0.072 | |  |
|  | | |  |  | | |  | |  |  | | |  | |  |
| *Among all with:* | | |  |  | | |  | |  |  | | |  | |  |
| Normal weight | | |  | 40.3% | | |  | |  | 63.0% | | |  | |  |
| Overweight | | |  | 55.2% | | |  | |  | 55.6% | | |  | |  |
| Obesity | | |  | 53.9% | | | **<0.001** | |  | 73.1% | | | 0.338 | |  |
|  | | |  |  | | |  | |  |  | | |  | |  |

p-value=chi-square test for difference in prevalence between BMI categories separately among women, men and all in each column. Women and men with underweight were not included due to low numbers. Bold font indicates p<0.05.


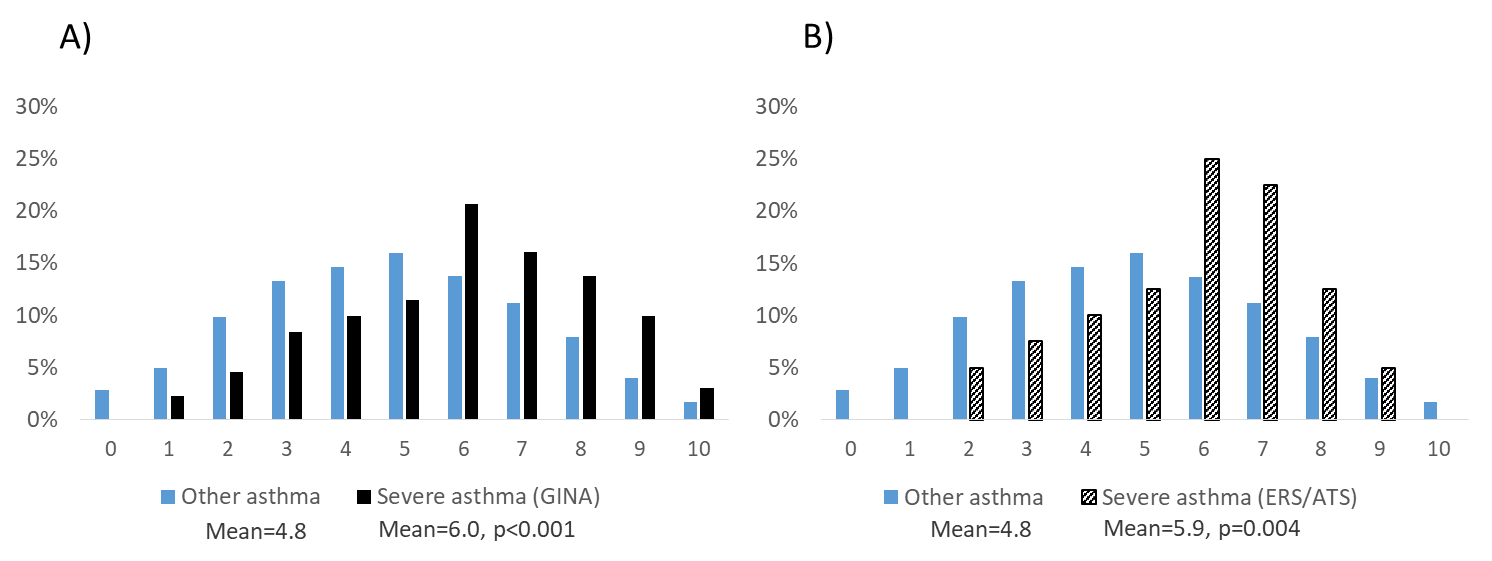


**Figure S1.** Proportions (%) reporting a total of 0-10 triggers at study entry among those with other asthma and severe asthma at follow-up according to **A**) GINA and **B**) ATS/ERS (p from T-test of difference in mean number of triggers).
